# Supplementary material for: Disruption of the Eng18B ENGase Gene in the Fungal Biocontrol Agent Trichoderma atroviride Affects Growth, Conidiation and Antagonistic Ability
Source: PubMed Central journal article supplement (PMC3346758; doi:10.1371/journal.pone.0036152), 2012-05-07
Supplement: pone.0036152.s001.pdf [file pone.0036152.s001.pdf]

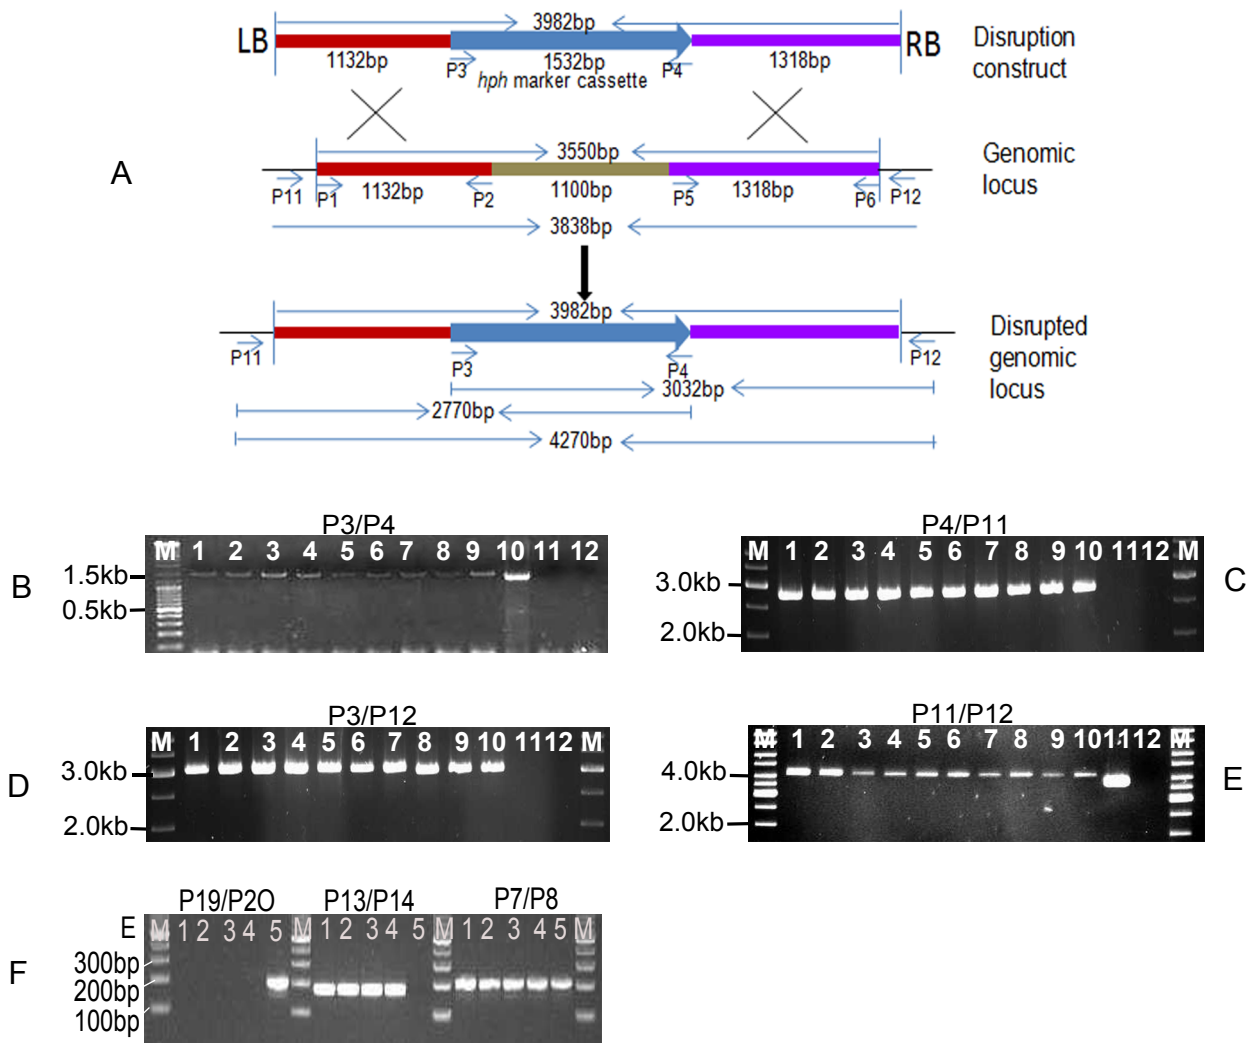

**Figure S1. Schematic representation of disruption cassette and characterization of  $\Delta Eng18B$  mutant strains using PCR and RT-PCR.** (A) Organisation of *Eng18B* locus in WT and mutant strain of *T. atroviride*. The *Eng18B* coding region was replaced by *hph* cassette by homologous recombination resulting in generation of  $\Delta Eng18B$  mutants. The small arrow heads indicate the location of primers used to construct the disruption cassette and analysis of mutants using PCR. The large arrow heads indicate the size of amplified PCR products. Abbreviations: LB, left boarder; RB, right boarder. Characterization of  $\Delta Eng18B$  mutant strains using PCR and RT-PCR. (B) PCR verification of *hph* cassette (1.5 kb) from genomic DNA of putative transformants and WT strains using specific primer pair (P3/P4). M, gene ruler DNA ladder mix; 1-9, nine independent  $\Delta Eng18B$  mutants; 10, disruption vector (pPm43GW-Eng18B-ko) as positive control; and 11-12, WT. (C & D) PCR verification using primers located in the *hph* gene (P3/P4) in combination with primers located upstream and downstream from the disruption cassette (P11/P12). PCR products of 2.8 kb and 3.1 kb using primers P4/P11 and P3/P12 were expected from a correct gene replacement. M, gene ruler DNA ladder mix; 1-10, independent  $\Delta Eng18B$  mutants; 11, WT; and 12, water control. (E) PCR verification of  $\Delta Eng18B$  mutants using primer pair (P11/P12) flanking the disruption cassette. PCR products of 4.3 kb and 3.8 kb were expected from the mutant and WT strains, respectively. M, gene ruler DNA ladder mix; 1-10, independent  $\Delta Eng18B$  mutants; 11, WT; and 12 water control. (F) RT-PCR analysis of gene expression in mutant and WT strains, using *Eng18B* and *hph* specific primers P19/P20 and P13/P14, respectively. Housekeeping gene *tef1* was used as internal control of cDNA quality and amplified by P7/P8 primers. M, gene ruler DNA ladder mix; 1-4, independent  $\Delta Eng18B$  mutant strains; and 5, WT. Primer combinations used for PCR and RT-PCR are given above the images.

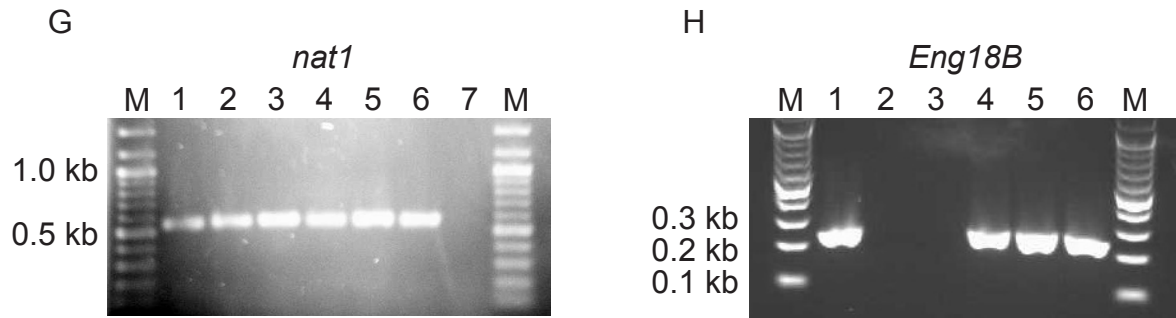

**FIG S1 continued. Characterization of  $\Delta Eng18B$ + complementation strains.** (G) PCR verification of *nat1* cassette from genomic DNA of putative transformants and WT strains using specific primer pair (P33/P34). M, gene ruler DNA ladder mix; 1-6, six independent  $\Delta Eng18B$ + complemented strains; and 7, WT. (H) RT-PCR analysis of *Eng18B* expression in WT,  $\Delta Eng18B$  knock-out and  $\Delta Eng18B$ + complemented strains, using *Eng18B* specific primers P19/P20. M, gene ruler DNA ladder mix; 1, WT; 2-3, independent  $\Delta Eng18B$  knock-out strains; and 4-6, independent  $\Delta Eng18B$ + complemented strains.
