# Supplementary material for: Disruption of the Eng18B ENGase Gene in the Fungal Biocontrol Agent Trichoderma atroviride Affects Growth, Conidiation and Antagonistic Ability
Source: PubMed Central journal article supplement (PMC3346758; doi:10.1371/journal.pone.0036152), 2012-05-07
Supplement: pone.0036152.s002.pdf [file pone.0036152.s002.pdf]

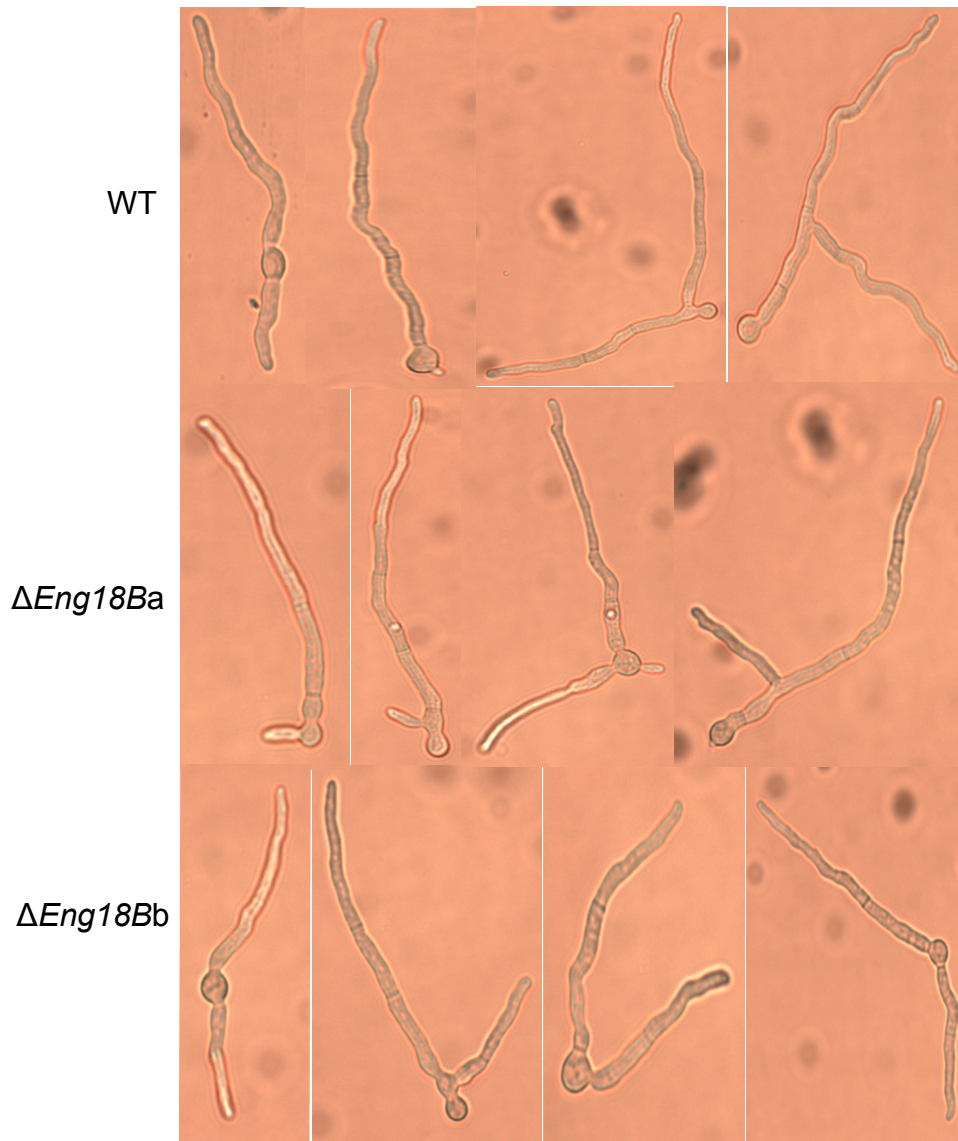

**Figure S2. Germ tube morphology of WT and  $\Delta Eng18B$  strains.** Conidia were inoculated in PDB medium and monitored using a Zeiss Axioplan microscope equipped with Leica application suite version 3.6.0. Images were taken 20 h post inoculation using a Leica DFC295 digital camera at the same magnification.
