# Supplementary material for: Disruption of the Eng18B ENGase Gene in the Fungal Biocontrol Agent Trichoderma atroviride Affects Growth, Conidiation and Antagonistic Ability
Source: PubMed Central journal article supplement (PMC3346758; doi:10.1371/journal.pone.0036152), 2012-05-07
Supplement: pone.0036152.s003.pdf [file pone.0036152.s003.pdf]

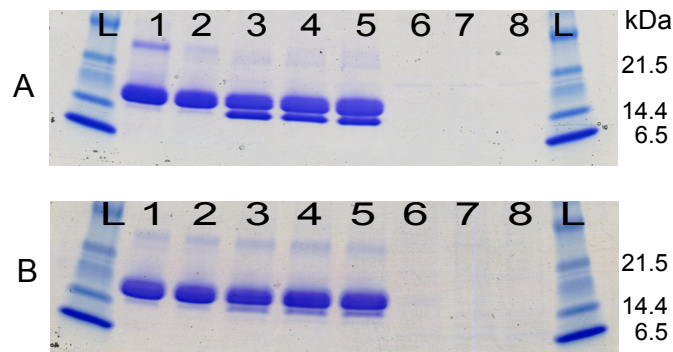

**Figure S3. SDS-PAGE analysis of ENGase-type activity in *T. atroviride* using (A) culture filtrate or (B) cytosolic fraction.** *T. atroviride* WT and  $\Delta Eng18B$  mutants were grown in dextrose broth for 48h at 25°C. Forty  $\mu$ l culture filtrate or cytosolic fraction was mixed with 100  $\mu$ g of RNase B and incubated at room temperature for 24h for deglycosylation. Twenty  $\mu$ l of the reactions were mixed with 5  $\mu$ l of loading dye and heat denatured at 100°C for 10 min before loading. L, protein ladder; 1, RNase B incubated with dextrose broth; 2, fresh RNase B; 3, WT culture filtrate or cytosolic fraction incubated with RNase B; 4 and 5,  $\Delta Eng18B$  mutants culture filtrate or cytosolic fraction incubated with RNase B; 6, WT culture filtrate or cytosolic fraction without RNase B; 7 and 8,  $\Delta Eng18B$  mutants culture filtrate or cytosolic fractions without RNase B.
